# Supplementary material for: Degradation of organic pollutants using a ternary heterojunction catalyst (CoS 2 /CoCo 2 O 4 –MnFe 2 O 4 ) for activating peroxymonosulfate with magnetic separation, anti-ion interference, and low ion leaching
Source: Royal Society of Chemistry journal article supplement (doi:10.1039/d4en00475b), 2024-01-01

## Supporting Information

### **Degradation of organic pollutants using a ternary heterojunction catalyst (CoS<sub>2</sub>/CoCo<sub>2</sub>O<sub>4</sub>-MnFe<sub>2</sub>O<sub>4</sub>) for activated peroxymonosulfate with magnetic separation, anti-ion interference, and low ion leaching**

Ying Shen <sup>a, ‡</sup>, Fan Qiu <sup>a, ‡</sup>, Yang Fan <sup>a</sup>, Yaming Wang <sup>a</sup>, Jiawei Kang <sup>a</sup>, Mengdie Yang <sup>a</sup>, Junjie Chen <sup>a</sup>, Haiou Song <sup>b, \*</sup>, Shupeng Zhang <sup>a, \*</sup>

<sup>a</sup> *School of Chemistry and Chemical Engineering, Nanjing University of Science and Technology, Nanjing 210094, China*

<sup>b</sup> *School of Environment, Nanjing Normal University, Nanjing, 210097, PR China*

<sup>‡</sup> Y. Shen and F. Qiu contributed equally to this work.

\* Corresponding authors.

*Tel/Fax:* +86 25 84315036

*E-mail address:* songhaiou2011@126.com (H.O. Song)

shupeng\_2006@126.com (S.P Zhang)

## 1 Experiment

### 1.1 Materials

Cobalt nitrate hexahydrate ( $\text{Co}(\text{NO}_3)_2 \cdot 6\text{H}_2\text{O}$ , A.R., Sinopanax Chemical Reagent Co., LTD.), thiourea ( $\text{CH}_4\text{N}_2\text{S}$ , A.R., Shanghai Woke Biotechnology Co., LTD.), Ammonia water ( $\text{H}_5\text{NO}$ , A.R., Aladdin), Manganese(II) chloride tetrahydrate ( $\text{MnCl}_2 \cdot 4\text{H}_2\text{O}$  A.R., Sinopanax Chemical Reagent Co., LTD.), iron (III) chloride hexahydrate ( $\text{FeCl}_3 \cdot 6\text{H}_2\text{O}$ , Sinopanax Chemical Reagent Co., LTD) ethanol ( $\text{C}_2\text{H}_5\text{OH}$ , A.R., Nanjing Chemical Reagents Co., LTD.), hydrochloric acid ( $\text{HCl}$ , A.R., Nanjing Chemical Reagents Co., LTD.), sodium hydroxide ( $\text{NaOH}$ , A.R., Sinophosphate Chemical Reagent Co., LTD.), potassium sulfate peroxide ( $\text{KHSO}_5$ , A.R., Macklin), sodium sulfate ( $\text{Na}_2\text{SO}_4$ , A.R., Sinophosphate Chemical Reagent Co., LTD.), sodium dihydrogen phosphate ( $\text{NaH}_2\text{PO}_4$ , A.R., Shanghai Yuanye Biotechnology Co., LTD.), sodium chloride ( $\text{NaCl}$ , A.R., Sinophosphate Chemical Reagents Co., LTD.), methanol ( $\text{CH}_3\text{OH}$ , A.R., Macklin), tert-butanol ( $\text{C}_4\text{H}_{10}\text{O}$ , A.R., Aladdin), L-histidine ( $\text{C}_6\text{H}_9\text{N}_3\text{O}_2$ , A.R.), tetracycline ( $\text{C}_{22}\text{H}_{24}\text{O}_8\text{N}_2 \cdot \text{HCl}$ , A.R., Bellingwell Technology Co., LTD.), metronidazole ( $\text{C}_6\text{H}_9\text{N}_3\text{O}_3$ , A.R., Aladdin), methylene blue ( $\text{C}_{16}\text{H}_{18}\text{ClN}_3\text{S} \cdot 3\text{H}_2\text{O}$ , A.R.), levofloxacin ( $\text{C}_{18}\text{H}_{20}\text{FN}_3\text{O}_4$ , A.R.), malachite green ( $\text{C}_{23}\text{H}_{25}\text{ClN}_2$ , A.R.), Macklin), crystal violet ( $\text{C}_{25}\text{H}_{30}\text{N}_3\text{Cl} \cdot 9\text{H}_2\text{O}$ , A.R., Macklin), rhodamine B ( $\text{C}_{28}\text{H}_{31}\text{ClN}_2\text{O}_3$ , A.R., Macklin) were used in this experiment. Ultrapure water was used throughout all experiments.

## 1.2 Synthesis proceeding

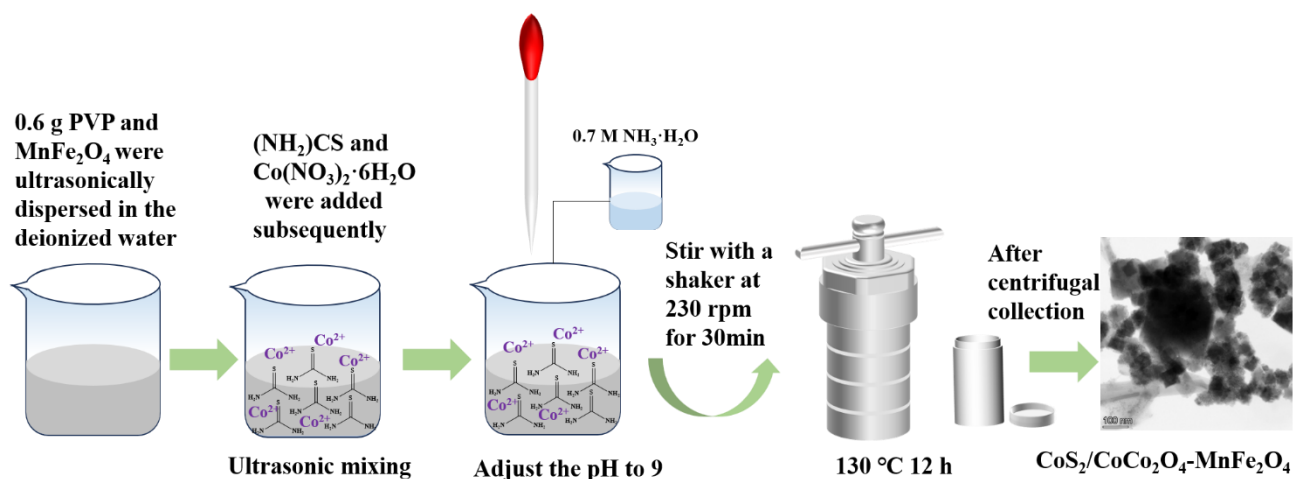

**Figure S1.** The schematic diagram of the synthetic route of CoS<sub>2</sub>/CoCo<sub>2</sub>O<sub>4</sub>-MnFe<sub>2</sub>O<sub>4</sub>-x.

## 1.3 Analytical method

The concentration of pollutants in solution was measured by ultraviolet spectrometer, and the linear relationship between absorbance A of MNZ and concentration C (mg/L) is measured, as shown in Equation (2.1):

$$\text{MNZ: } A = 0.0528C - 0.01017 \quad R^2 = 0.999 \quad (2.1)$$

The linear relationship between absorbance (A) and concentration C (mg/L) of TC is measured, as shown in Equation (2.2):

$$\text{TC } A = 0.032C + 0.0065 \quad R^2 = 0.999 \quad (2.2)$$

The linear relationship between absorbance (A) and concentration C (mg/L) of LFX is measured, as shown in Equation (2.3):

$$\text{LFX: } A = 0.05973C + 0.09943 \quad R^2 = 0.995 \quad (2.3)$$

The linear relationship between absorbance (A) and concentration C (mg/L) of CV is measured, as shown in Equation (2.4):

$$\text{CV: } A = 0.09602C + 0.00682 \quad R^2 = 0.999 \quad (2.4)$$

The linear relationship between absorbance (A) and concentration C (mg/L) of RhB is measured, as shown in Equation (2.5):

$$\text{RhB: } A = 0.0268C + 0.0141 \quad R^2 = 0.998 \quad (2.5)$$

The removal rate of pollutants is calculated according to Equation (2.6):

$$r = \frac{C_0 - C_t}{C_0} \times 100\% \quad (2.6)$$

Where,  $C_0$  and  $C_t$  are the pollutant concentration at the initial time and time  $t$  respectively, mg/L.

In the degradation process of MB, it conforms to the pseudo-first-order kinetic model, as shown in Equation (2.10) <sup>1</sup> :

$$-\frac{dC_t}{dt} = k \times C_t \quad (2.10)$$

Where,  $k$  is the pseudo-first-order rate constant, expressed in  $\text{min}^{-1}$ .

#### *1.4 Experimental method*

Additionally, the effects of catalyst dose, PMS dose, initial concentration of TCH, and inorganic ions on the reaction were investigated. The experiment continues, by examining the effect of methanol (MeOH), tert-Butanol (tert-Buoh), trichloromethane ( $\text{CHCl}_3$ ) and L-Histidine on the removal performance, determine the type of radical involved. Moreover, cyclic tests were conducted to evaluate the reusability and stability of the catalyst. After each operation, the used catalyst is collected with magnet, washed with ultra-pure water and dried, and then no other treatment is done to continue the degradation experiment. The experimental process is the same as the above operation of degradation experiment. The ions (Fe, Co and Mn) leached from the catalyst surface were detected by ICP-MS in the cyclic test. Finally, the possible activation mechanism and active components of PMS are described in detail. It is worth noting that the experiment was conducted three times and the results were expressed as averages.

### *1.5 Representational means*

The surface morphology of the catalyst was observed by scanning electron microscopy (SEM, Quant 250FEG, FEI Corporation) and transmission electron microscopy (TEM, Talos F200X, FEI Corporation). The crystal structure and composition were analyzed by X-ray diffractometer (XRD, Bruker D8 Advance, Bruker, Germany). The test conditions were as follows: the target was copper, the scanning range was 20~90°, and the scanning speed was 2 °/min. The composition and state of the elements on the surface of the sample were analyzed by X-ray photoelectron spectrometer (XPS, PHI QuanteraII, Ulvac-Phi, Japan) under the test condition of Al- $\kappa\alpha$  X-ray. Chemical bonding and identification of chemical species were studied by Fourier infrared spectrometer (TFIR, NICOLETIS10, Thermo Fisher Technology). The test conditions were: mid-infrared KBr beam splitter, DTGS detector, KBr window, scanning range of 4000~500  $\text{cm}^{-1}$ . Oxygen defects in the material were detected by paramagnetic resonance spectroscopy (EPR, Bruker A300, Bruker GMBH). The leaching content of metal elements in materials was detected by inductively coupled plasma mass spectrometer (ICP-MS, i-CAPQ, ThermoFisher). The magnetic properties of different materials are tested by superconducting quantum magnetometer (VSM, SQUID-VSM, SI).

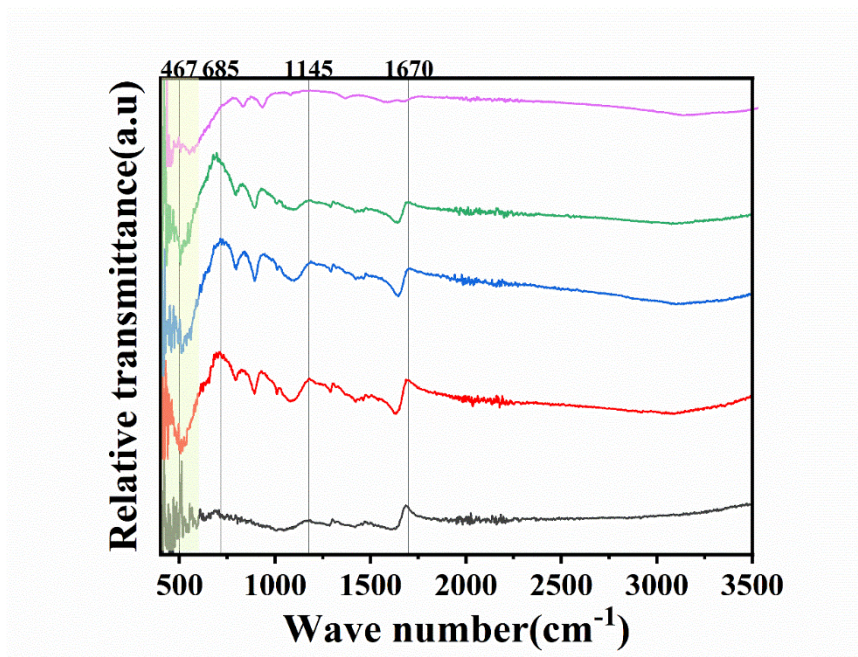

**Figure S2.** FT-IR spectra of  $\text{CoS}_2/\text{CoCo}_2\text{O}_4$ ,  $\text{MnFe}_2\text{O}_4$  and  $\text{CoS}_2/\text{CoCo}_2\text{O}_4\text{-MnFe}_2\text{O}_4\text{-x}$  samples.

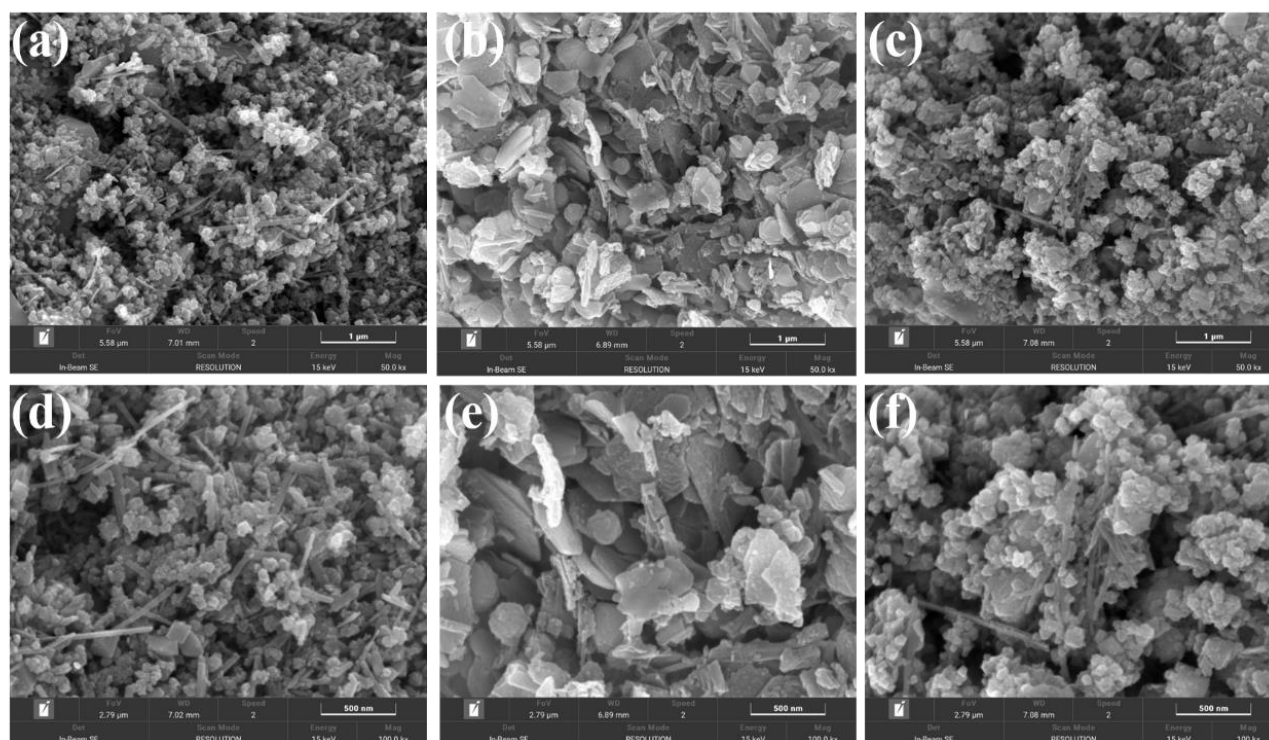

**Figure S3.** (a) SEM image of  $\text{MnFe}_2\text{O}_4$  at 50 kx, (b) SEM image of  $\text{CoS}_2/\text{CoCo}_2\text{O}_4$  at 50 kx, (c) SEM image of  $\text{CoS}_2/\text{CoCo}_2\text{O}_4\text{-MnFe}_2\text{O}_4$  at 50 kx; (d) SEM image of  $\text{MnFe}_2\text{O}_4$  at 100 kx, (e) SEM image of  $\text{CoS}_2/\text{CoCo}_2\text{O}_4$  at 100 kx, (f) SEM image of  $\text{CoS}_2/\text{CoCo}_2\text{O}_4\text{-MnFe}_2\text{O}_4$  at 100 kx.

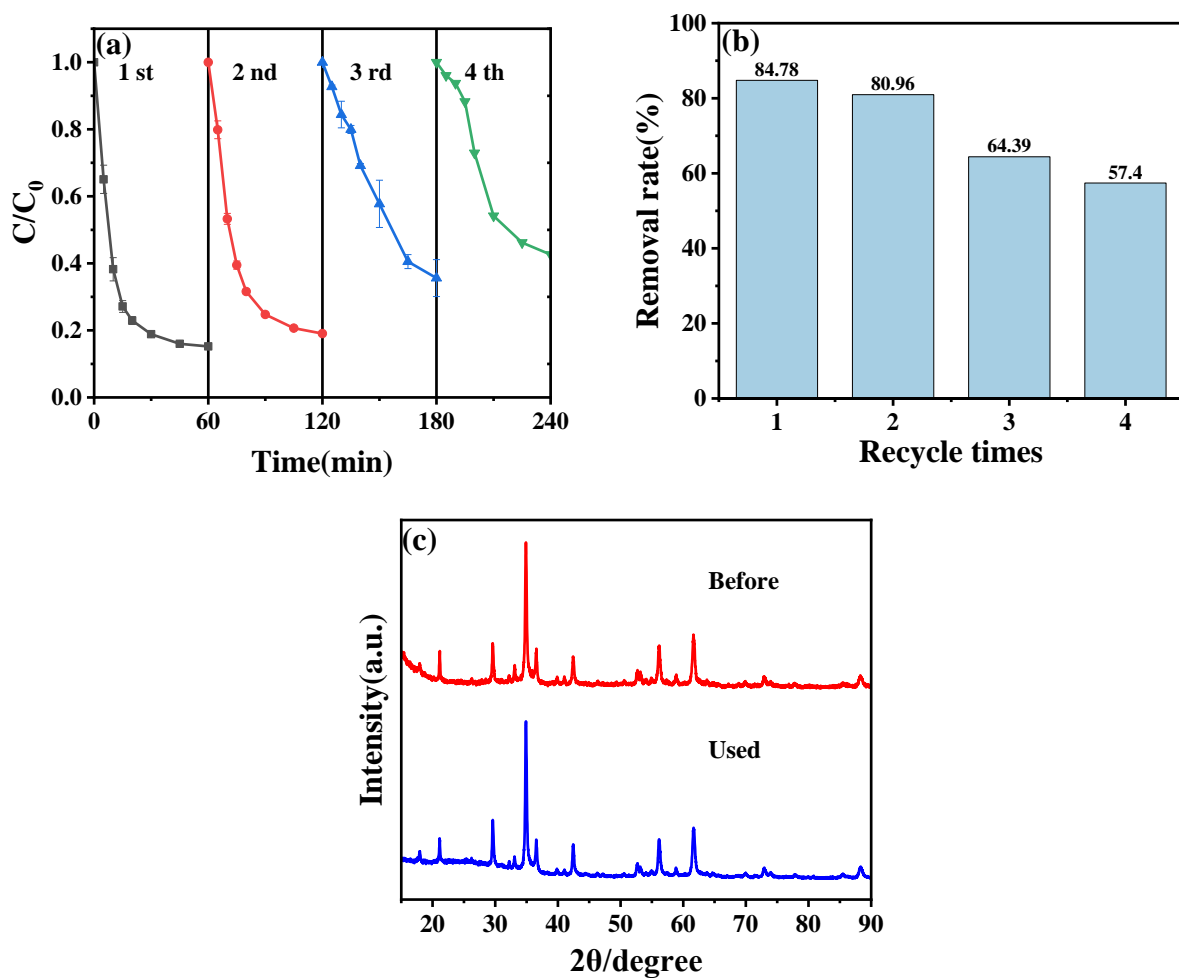

**Figure S4.** (a) Reusability test for  $\text{CoS}_2/\text{CoCo}_2\text{O}_4\text{-MnFe}_2\text{O}_4\text{-2}$  Experimental conditions: [catalyst] = 100 mg/L,  $[\text{PMS}]_0 = 1$  mM,  $[\text{TC}]_0 = 20$  mg/L, pH = 7, T = 288 K; (b) Bar chart of removal rate corresponding to (a); (c) XRD patterns of before and used  $\text{CoS}_2/\text{CoCo}_2\text{O}_4\text{-MnFe}_2\text{O}_4\text{-2}$ .

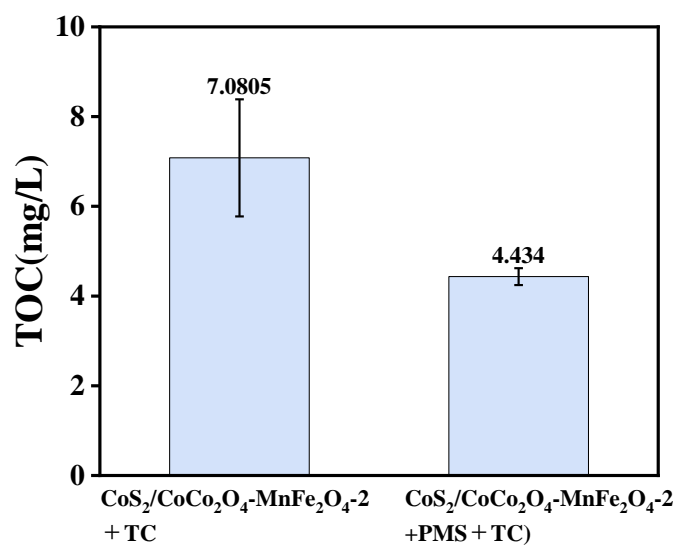

**Figure S5.** Bar graph of TOC in different systems.

**Table S1.** Possible degradation intermediates of TC in the CoS<sub>2</sub>/CoCo<sub>2</sub>O<sub>4</sub>-MnFe<sub>2</sub>O<sub>4</sub>-2/PMS system.

| Products | Retention time (min) | Mass (m/z) | Supposed Structure |
|----------|----------------------|------------|--------------------|
| TC       | 9.23                 | 445        |                    |
| P1       | 7.28                 | 397        |                    |
| P2       | 1.22                 | 297        |                    |
| P3       | 1.17                 | 195        |                    |
| P4       | 0.80                 | 431        |                    |



|            |      |     |                                                                                       |
|------------|------|-----|---------------------------------------------------------------------------------------|
| <b>P5</b>  | 0.82 | 413 | 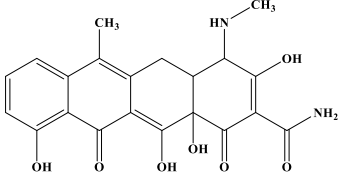   |
| <b>P6</b>  | 7.96 | 332 |    |
| <b>P7</b>  | 0.84 | 289 |    |
| <b>P8</b>  | 6.62 | 404 |    |
| <b>P9</b>  | 9.24 | 341 |   |
| <b>P10</b> | 0.61 | 301 |  |
| <b>P11</b> | 6.16 | 217 |  |
| <b>P12</b> | 4.34 | 172 |  |
| <b>P13</b> | 5.92 | 200 |  |
| <b>P14</b> | 6.33 | 341 |  |
| <b>P15</b> | 6.88 | 270 |  |

|            |      |     |                                                                                       |
|------------|------|-----|---------------------------------------------------------------------------------------|
| <b>P16</b> | 5.31 | 183 | 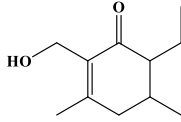   |
| <b>P17</b> | 4.34 | 155 |    |
| <b>P18</b> | 1.22 | 149 |    |
| <b>P19</b> | 0.67 | 226 |    |
| <b>P20</b> | 4.85 | 130 |    |
| <b>P21</b> | 4.41 | 94  |   |
| <b>P22</b> | 6.45 | 74  |  |
| <b>P23</b> | 3.94 | 60  |  |

20240721-NB-1 #1290-1302 RT: 9.23-9.32 AV: 13 SB: 119 5 62-6 47 NI: 3 27F7  
T: + c ESI Q1MS [50.000-500.000]

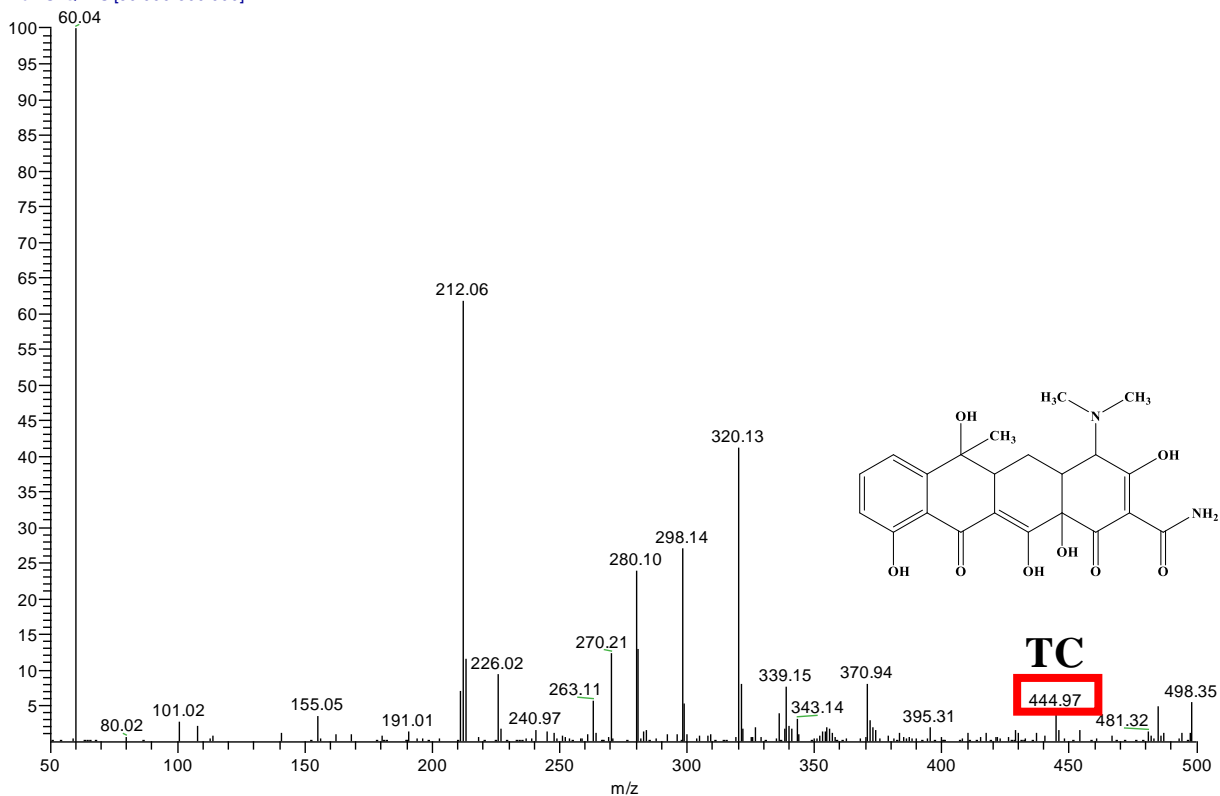

20240721-NB-0 #728-744 RT: 5.21-5.32 AV: 17 SB: 19 0.03-0 16 NI: 2 15F7  
T: + c ESI Q1MS [50.000-500.000]

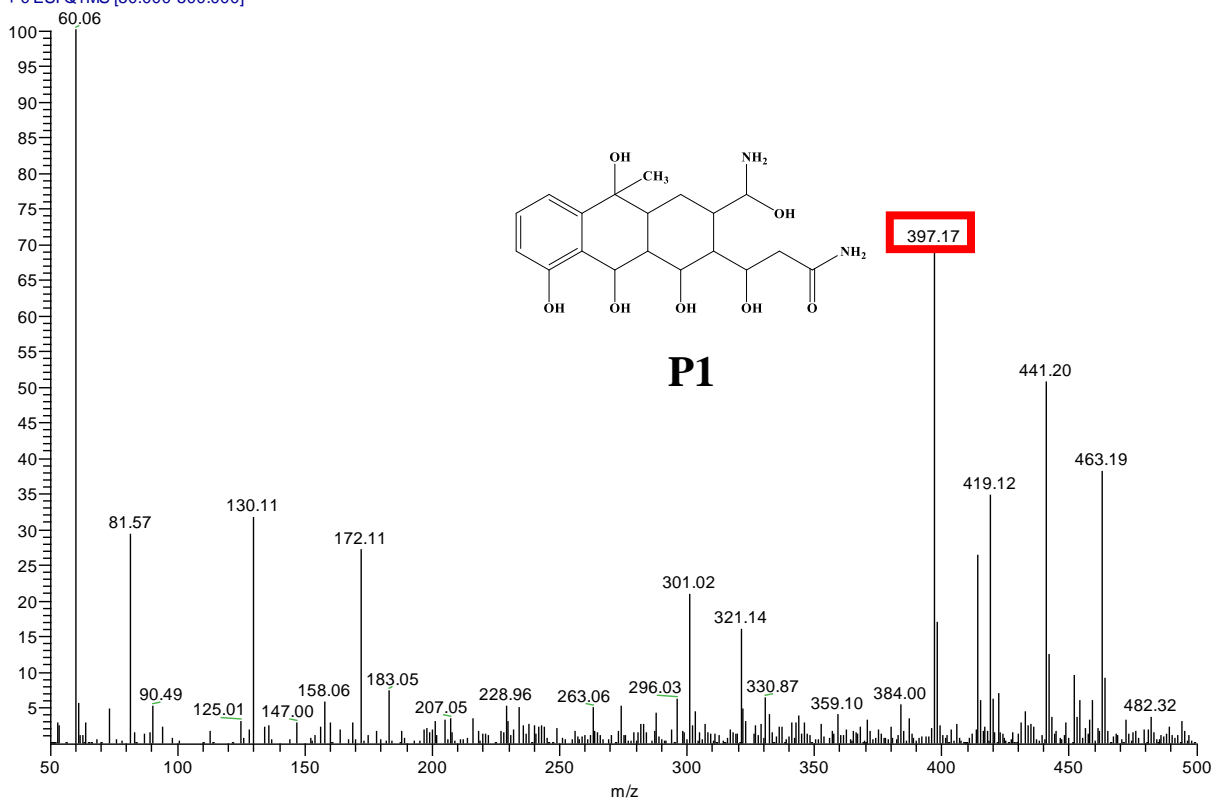

20240721-NB-4 #171-209 RT: 1.22-1.49 AV: 39 SB: 18 0.03-0.15 NI: 3 10F7  
T: + c ESI Q1MS [50.000-500.000]

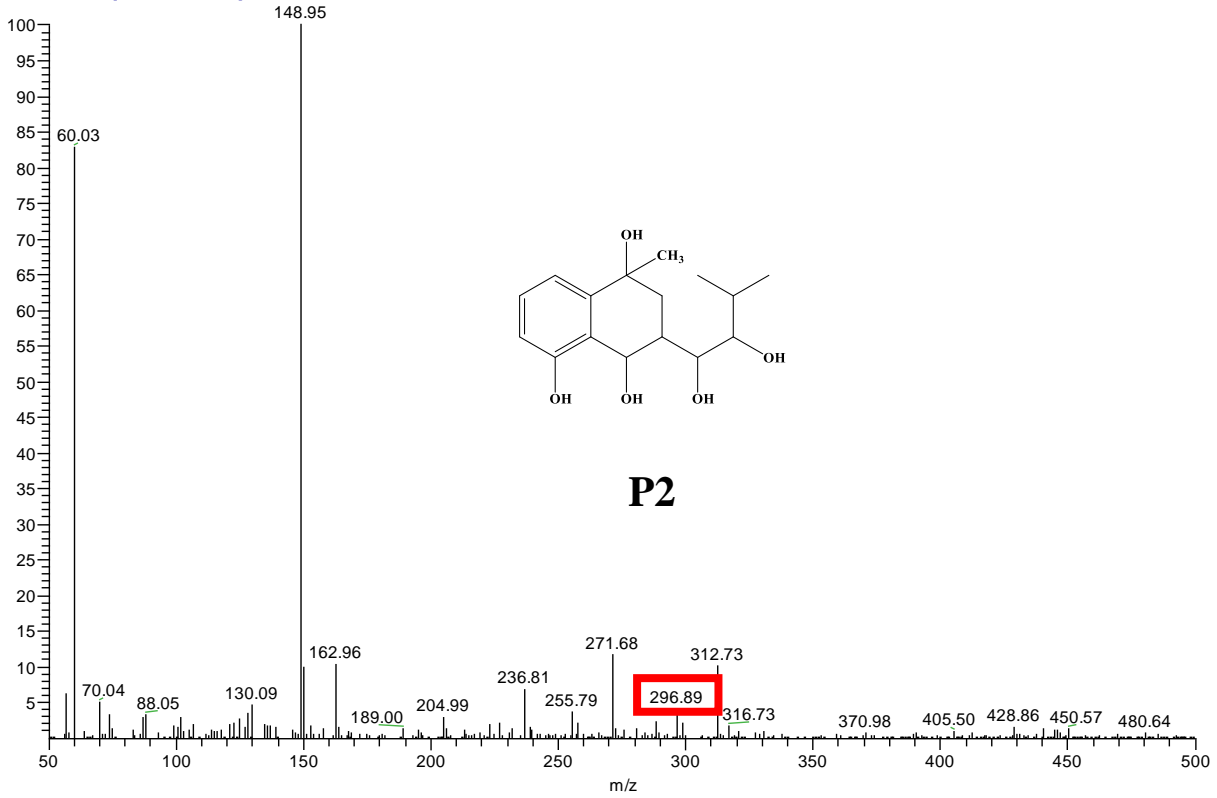

20240721-NB-1 #165-206 RT: 1.18-1.47 AV: 42 SB: 19 0.03-0.16 NI: 2 30F7  
T: + c ESI Q1MS [50.000-500.000]

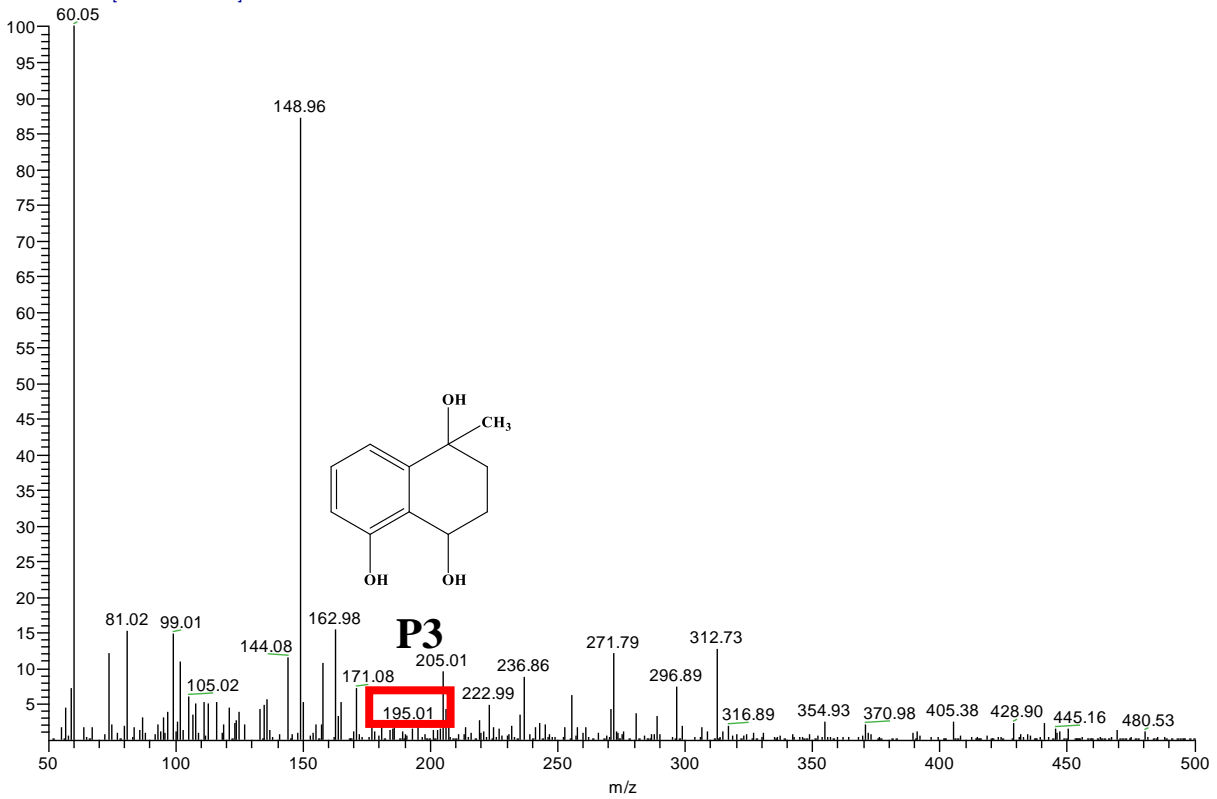

20240721-NB-1 #89-112 RT: 0.63-0.80 AV: 24 SB: 19 0.03-0.16 NL: 1.50E8  
T: + c ESI Q1MS [50.000-500.000]

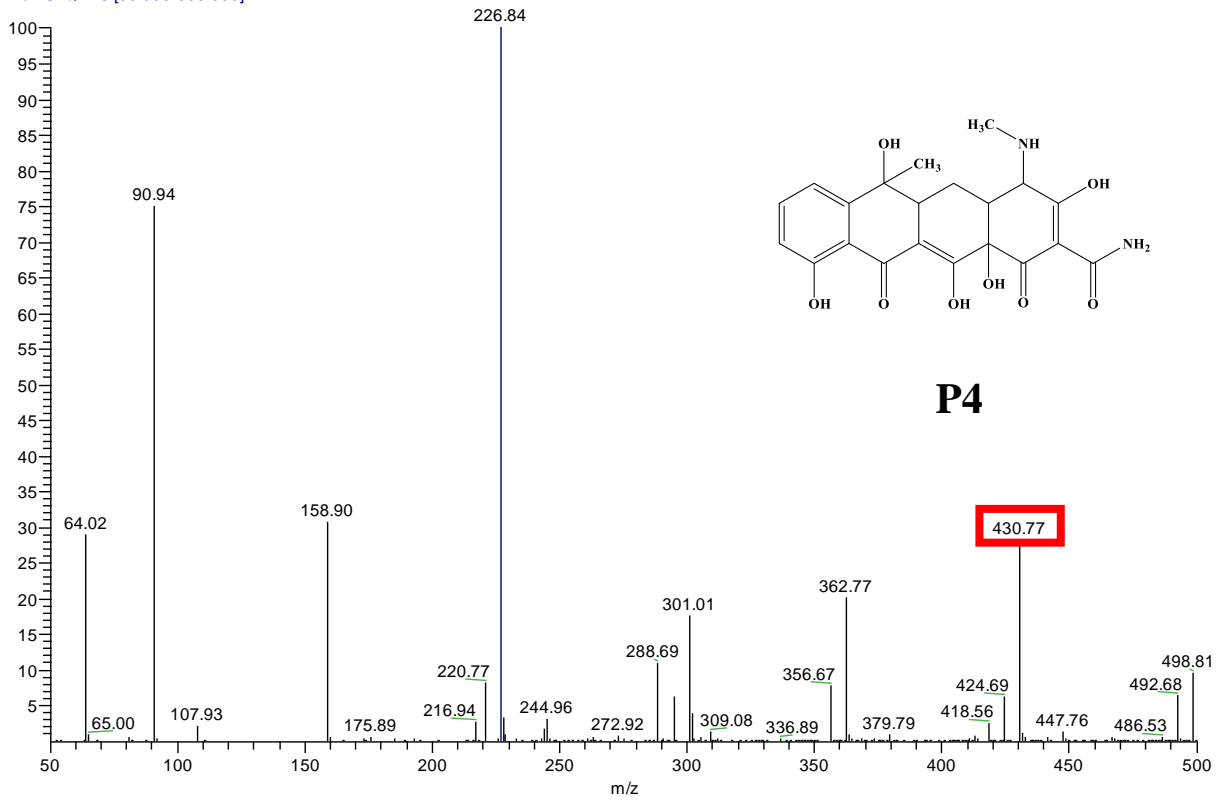

20240721-NB-4 #90-115 RT: 0.64-0.82 AV: 26 SB: 18 0.03-0.15 NI: 1.19E8  
T: + c ESI Q1MS [50.000-500.000]

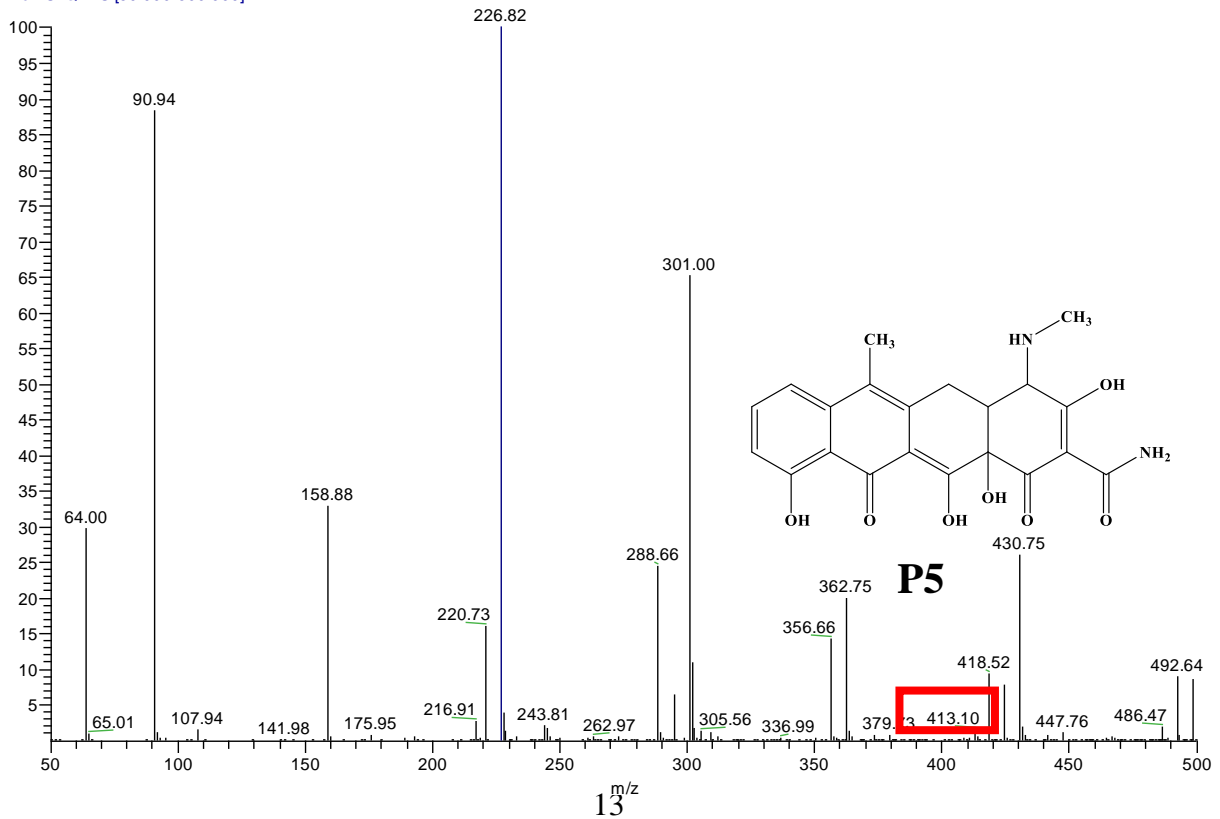

20240721-NB-1 #1112-1152 RT: 7.96-8.25 AV: 41 SB: 19 0.03-0.16 NL: 9.21E7  
T: + c ESI Q1MS [50.000-500.000]

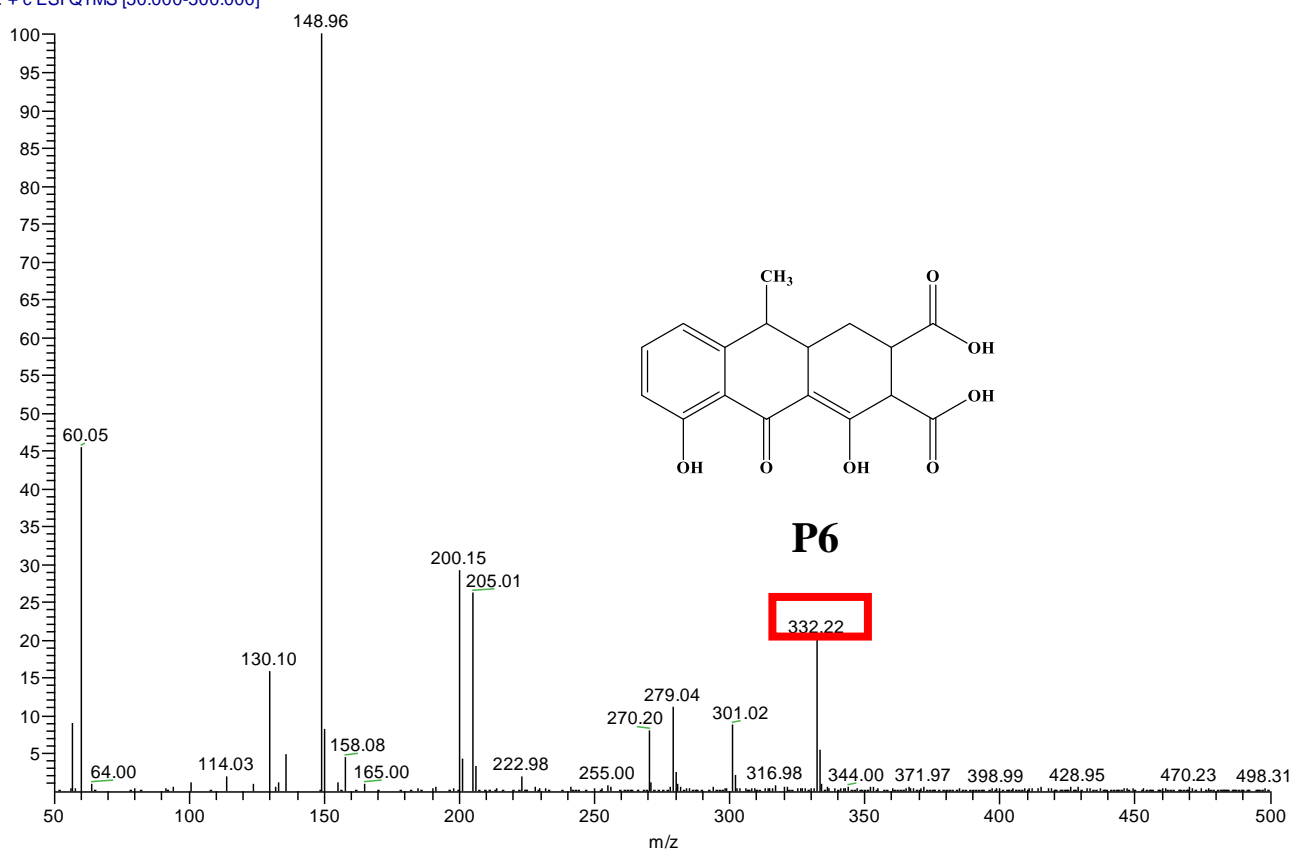

20240721-NB-8 #99-118 RT: 0.71-0.84 AV: 20 SB: 18 0.03-0.16 NI: 2.11E8  
T: + c ESI Q1MS [50.000-500.000]

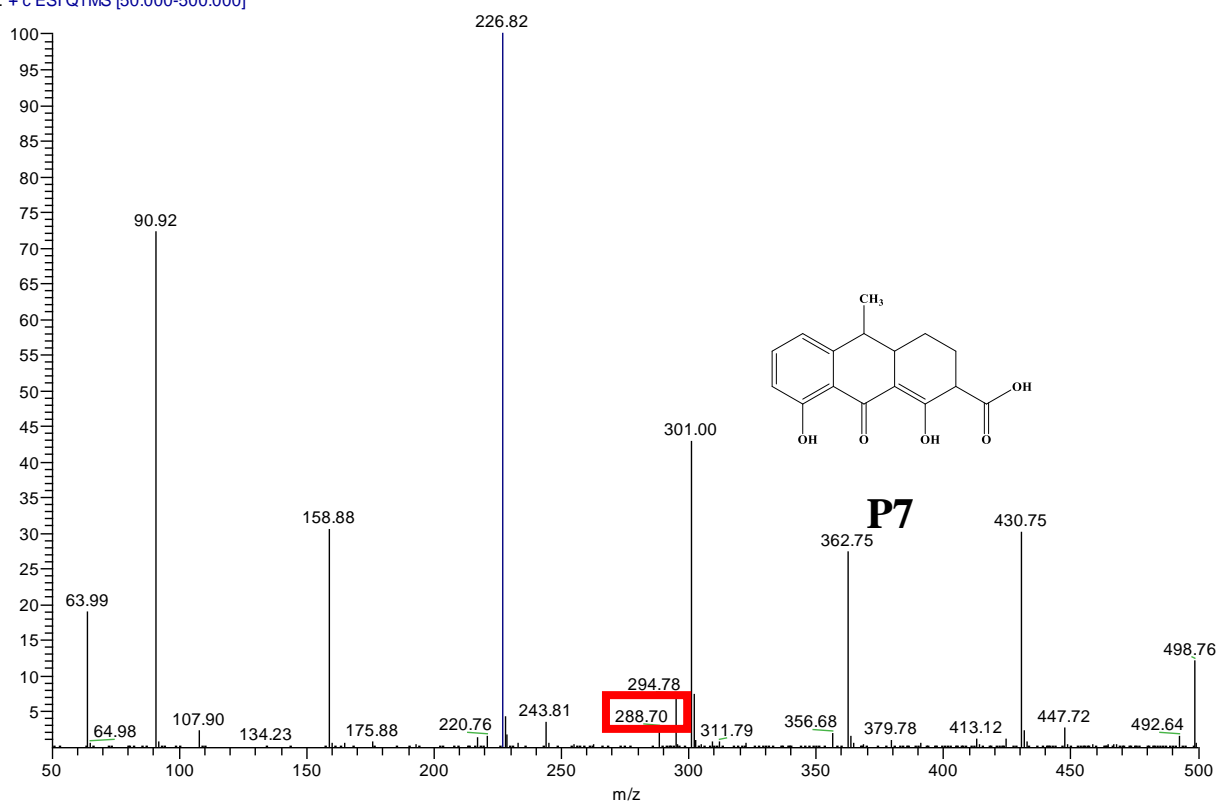

20240721-NB-0 #925-953 RT: 6.62-6.82 AV: 29 SB: 64 5.78-6.23 NI: 202F7  
T: + c ESI Q1MS [50.000-500.000]

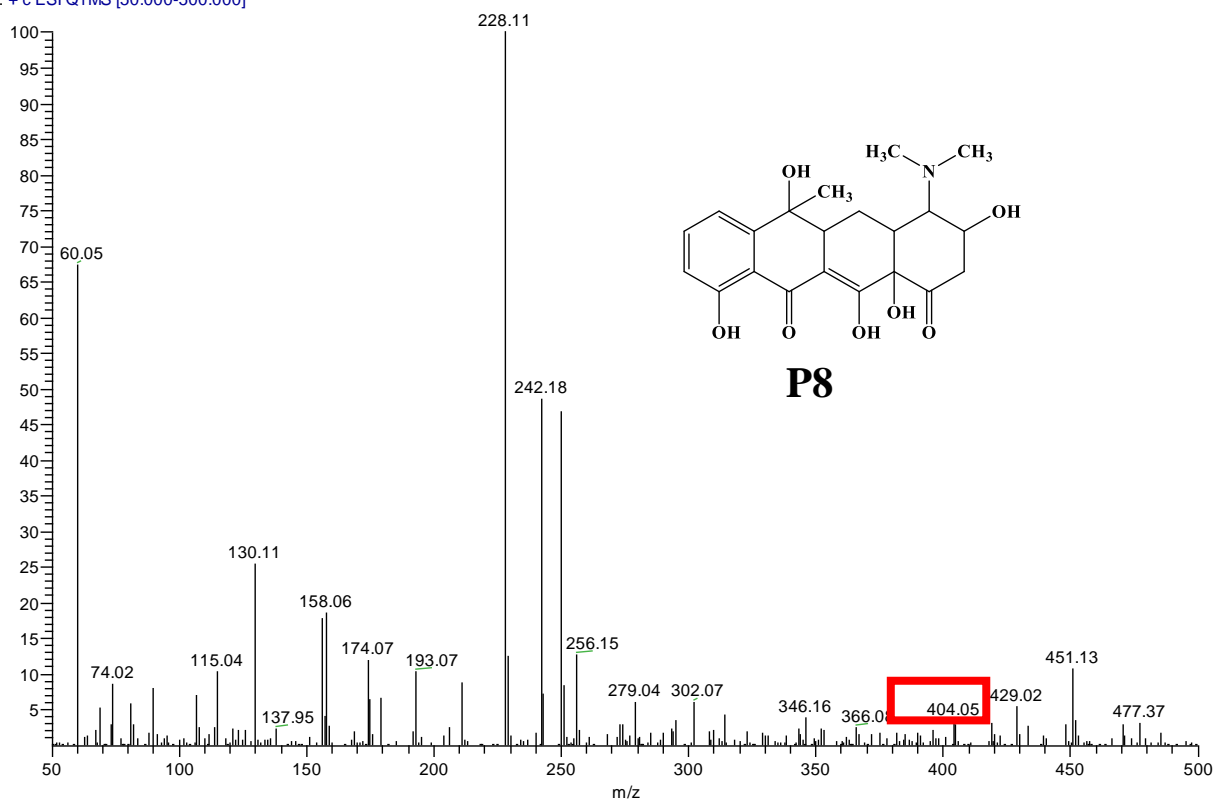

20240721-NB-0 #1291-1345 RT: 9.24-9.63 AV: 55 SB: 64 5.78-6.23 NL: 3.89E7  
T: + c ESI Q1MS [50.000-500.000]

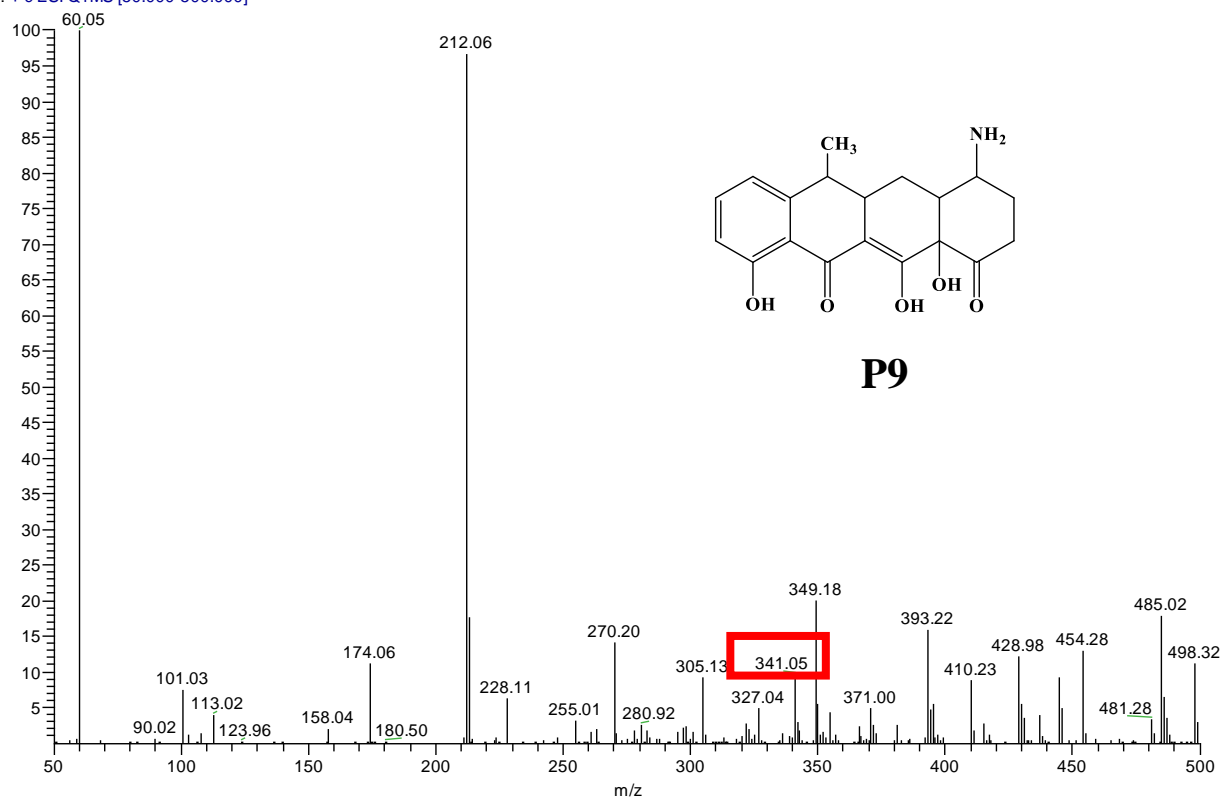

20240721-NB-3 #86-112 RT: 0.61-0.80 AV: 27 SB: 18 0.03-0.15 NL: 1.19E8  
T: + c ESI Q1MS [50.000-500.000]

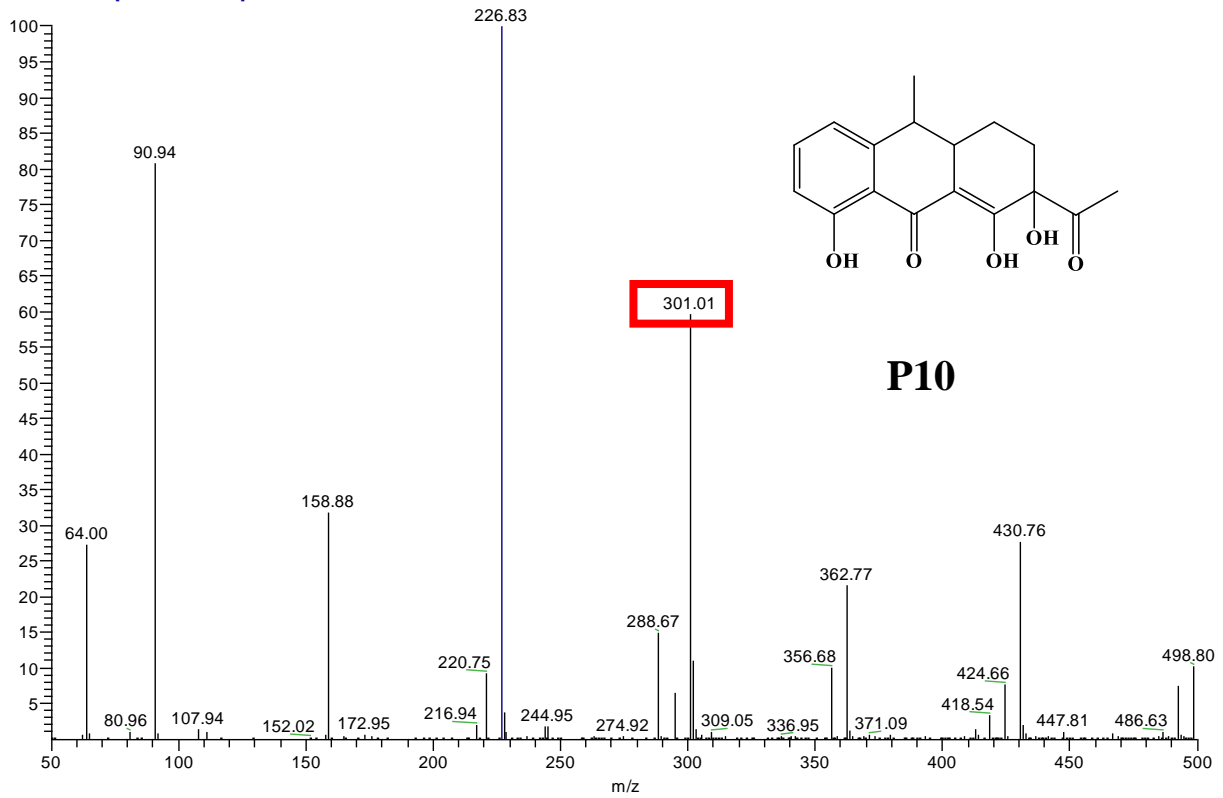

20240721-NB-3 #861-920 RT: 6.16-6.59 AV: 60 SB: 68 5.76-6.24 NL: 5.43E6  
T: + c ESI Q1MS [50.000-500.000]

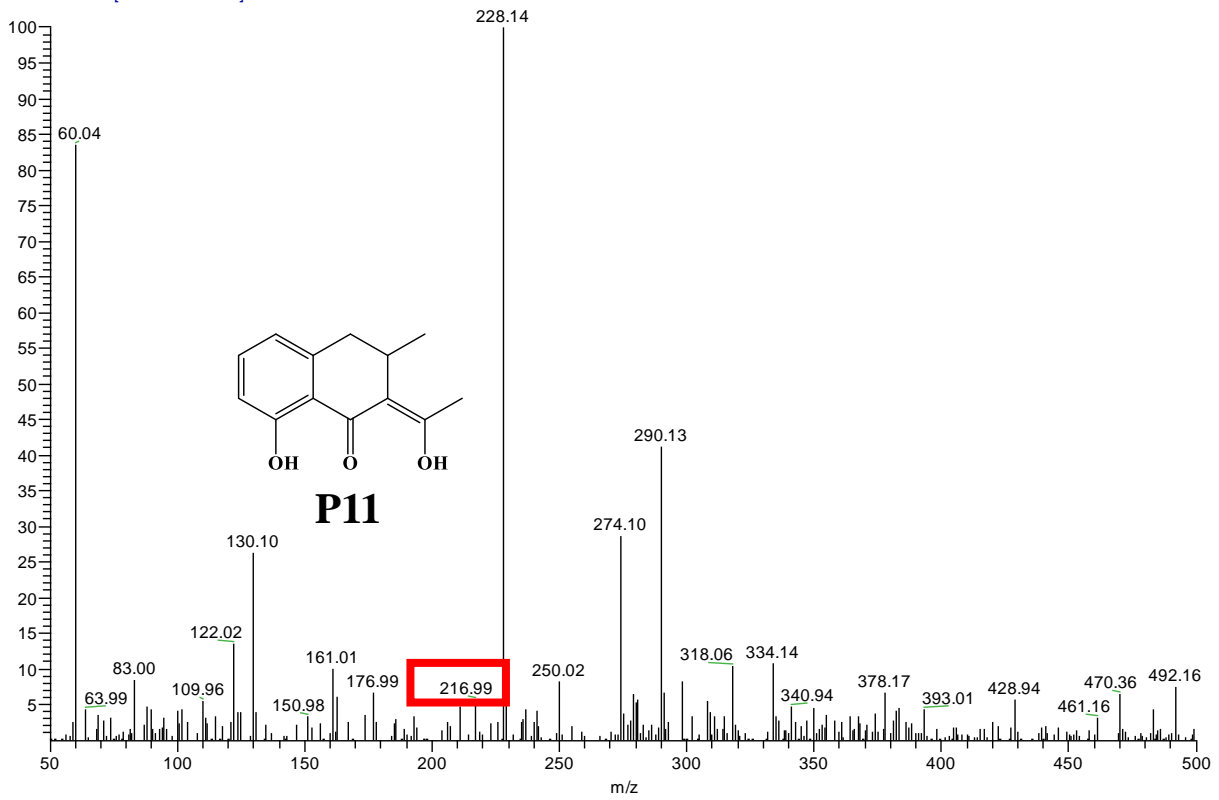



20240721-NB-7 #607-671 RT: 4.34-4.80 AV: 65 SB: 38 3.97-4.24 NL: 7.10F6  
T: + c ESI Q1MS [50.000-500.000]

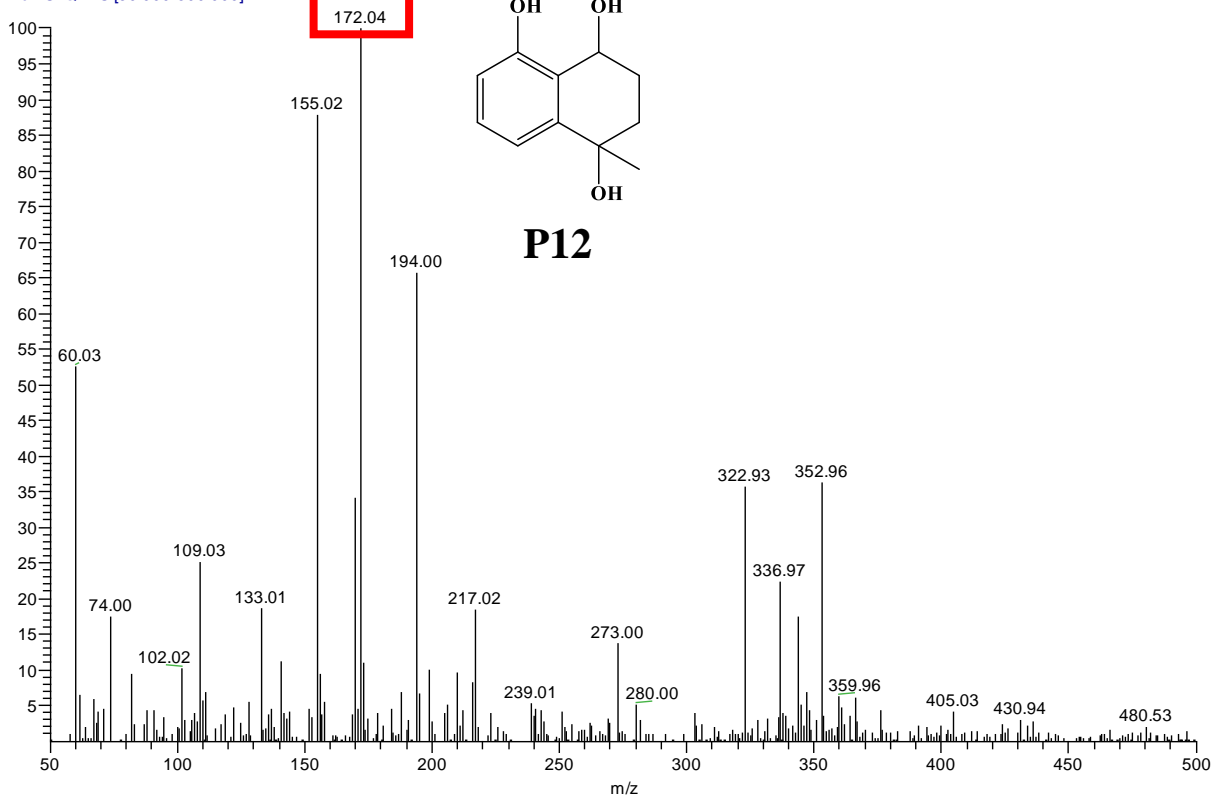

20240721-NB-0 #827-879 RT: 5.92-6.29 AV: 53 SB: 19 0.03-0.16 NI: 3.58F8  
T: + c ESI Q1MS [50.000-500.000]

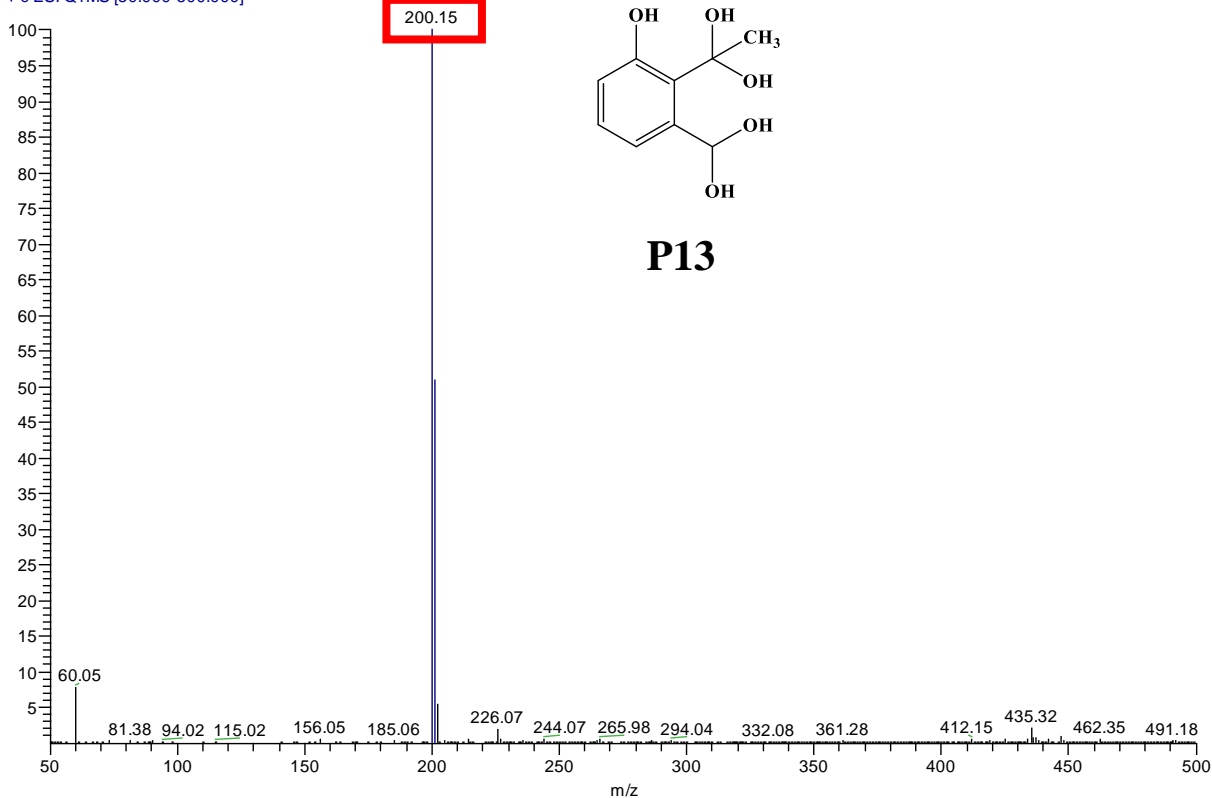

20240721-NB-2 #884-924 RT: 6.33-6.62 AV: 41 SB: 139 5.31-6.30 NL: 1.10E7  
T: + c ESI Q1MS [50.000-500.000]

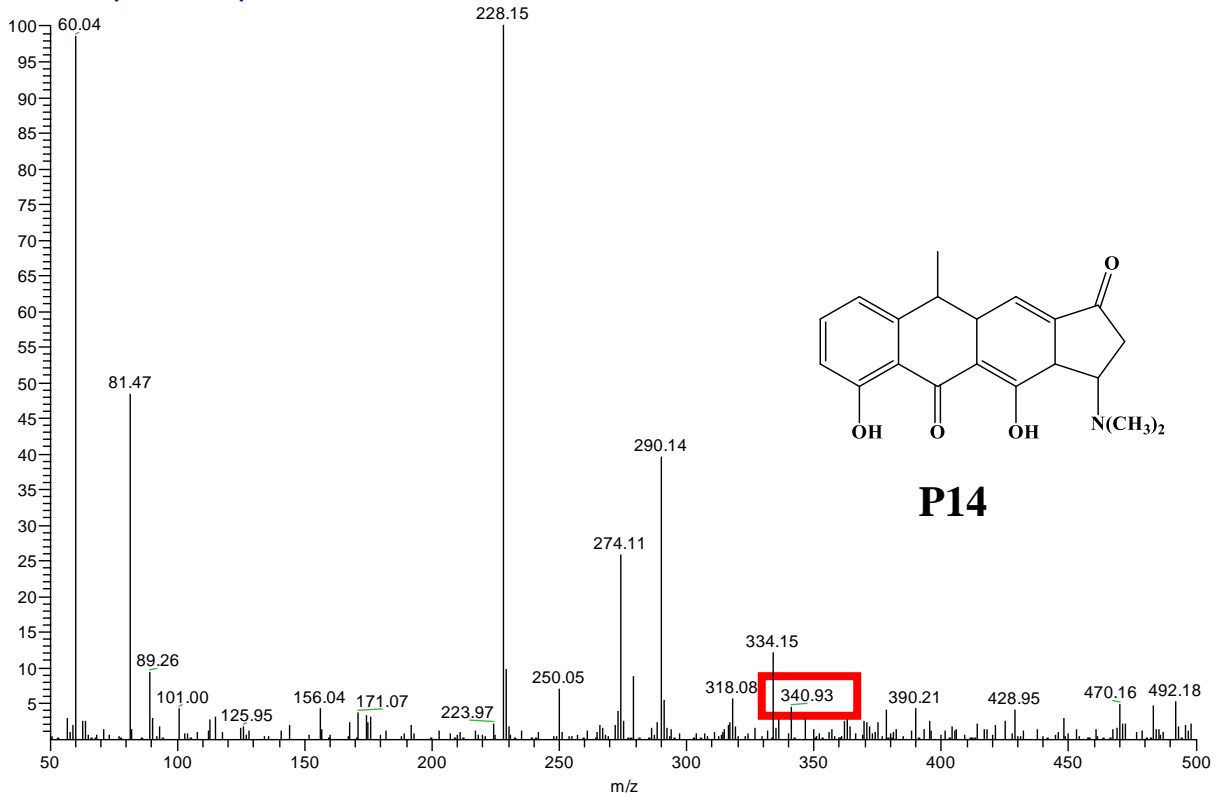

20240721-NB-2 #961-1009 RT: 6.88-7.22 AV: 49 SB: 139 5.31-6.30 NI: 1.34E8  
T: + c ESI Q1MS [50.000-500.000]

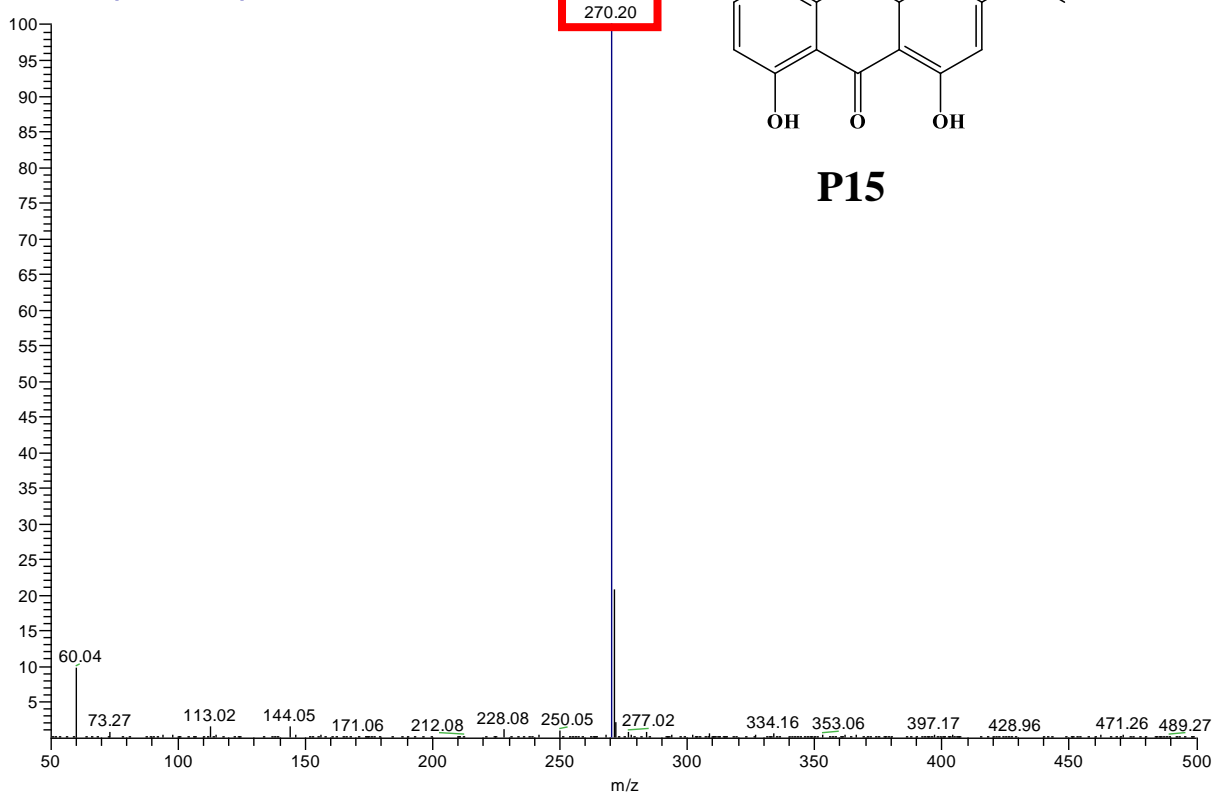

20240721-NB-0 #728-744 RT: 5.21-5.32 AV: 17 SB: 19 0.03-0.16 NL: 2.15E7  
T: + c ESI Q1MS [50.000-500.000]

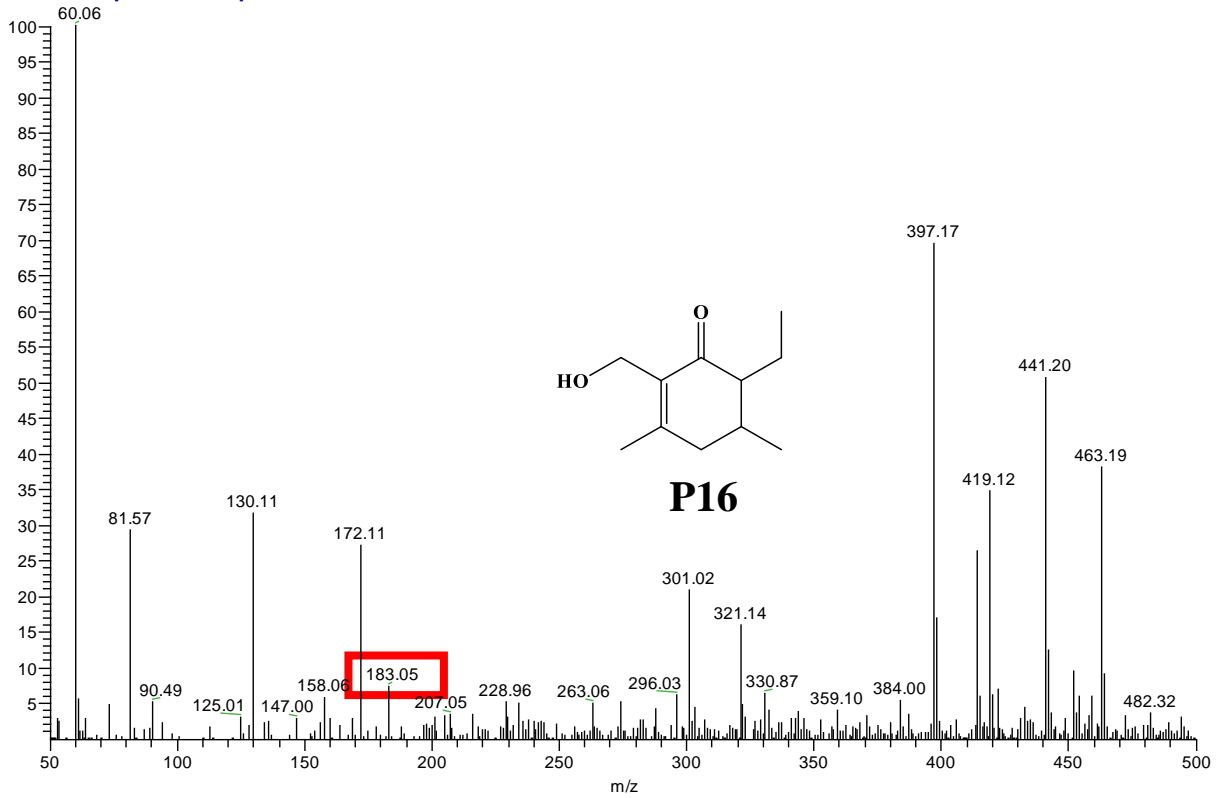

20240721-NB-7 #607-671 RT: 4.34-4.80 AV: 65 SB: 38 3.97-4.24 NI: 7.10F6  
T: + c ESI Q1MS [50.000-500.000]

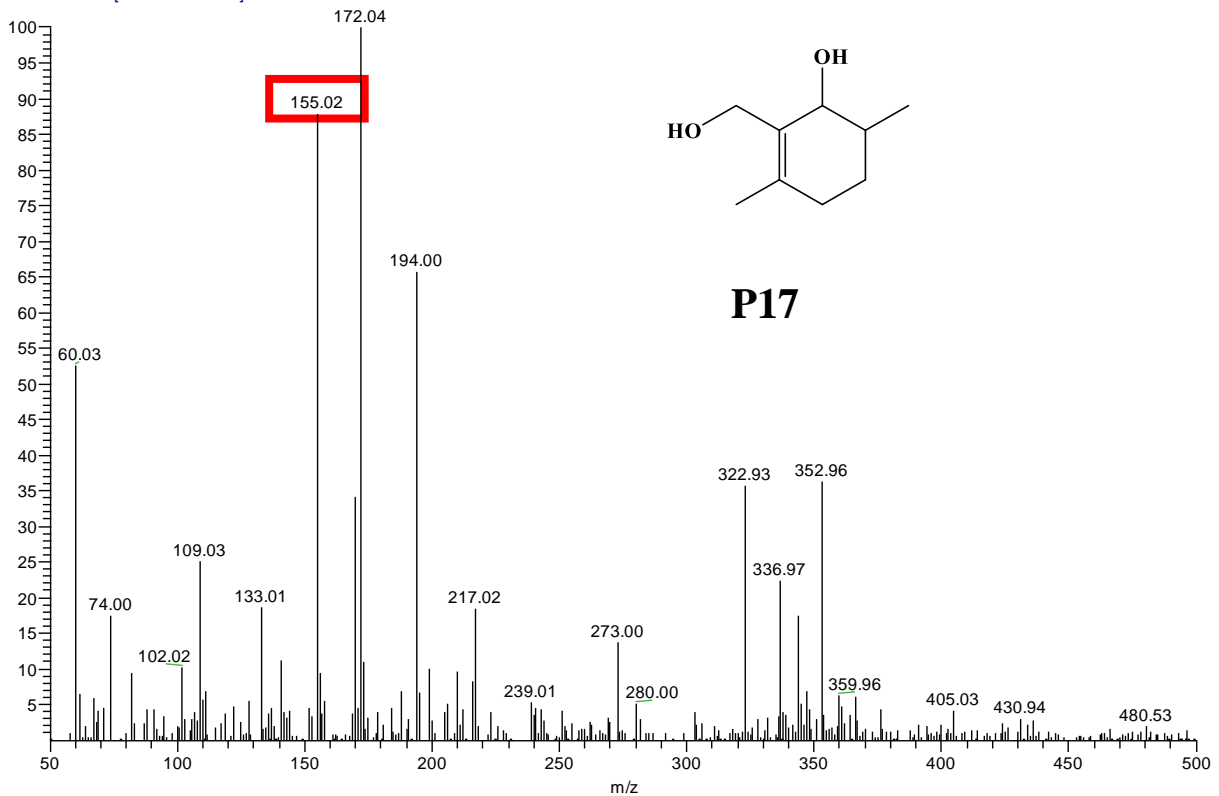

20240721-NB-4 #171-209 RT: 1.22-1.49 AV: 39 SB: 18 0.03-0.15 NI: 3.10F7  
T: + c ESI Q1MS [50.000-500.000]

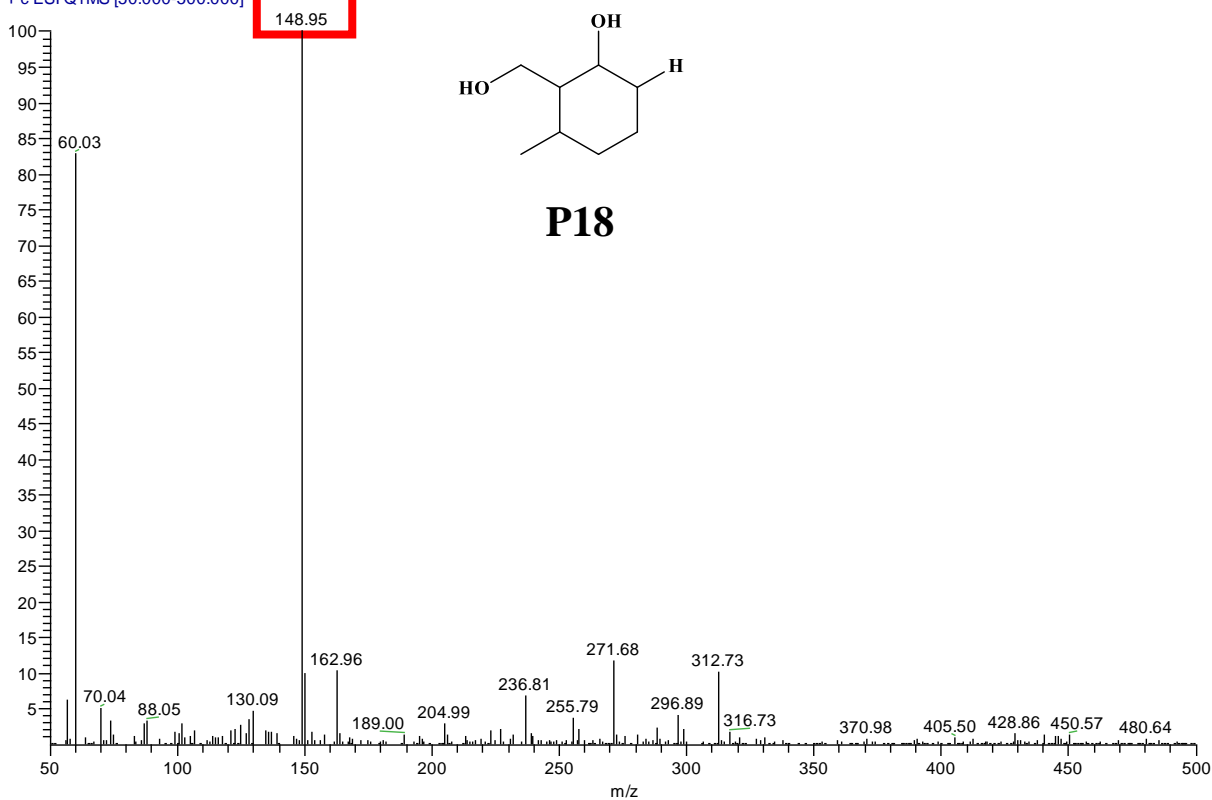

20240721-NB-6 #94-116 RT: 0.67-0.83 AV: 23 SB: 19 0.03-0.16 NI: 2.23F8  
T: + c ESI Q1MS [50.000-500.000]

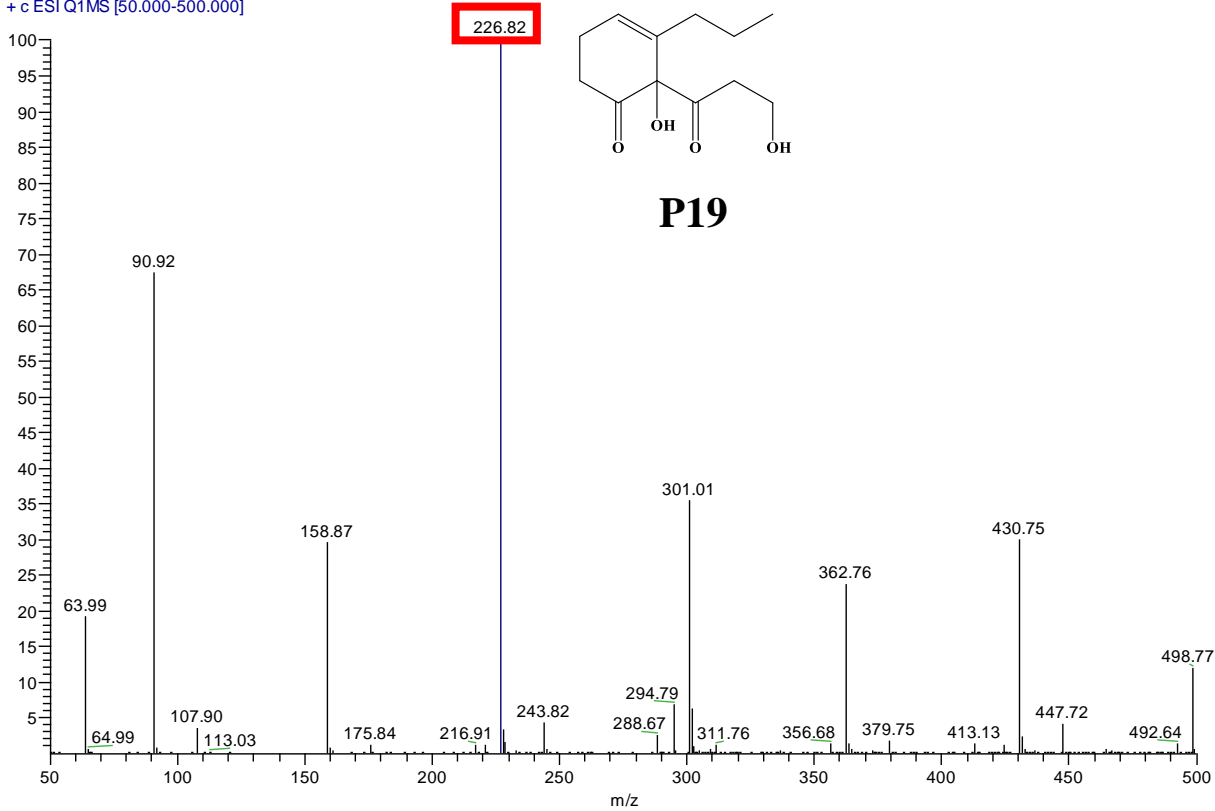

20240721-NB-4 #561-678 RT: 4.02-4.85 AV: 118 SB: 18 0.03-0.15 NI: 7.32F7  
T: + c ESI Q1MS [50.000-500.000]

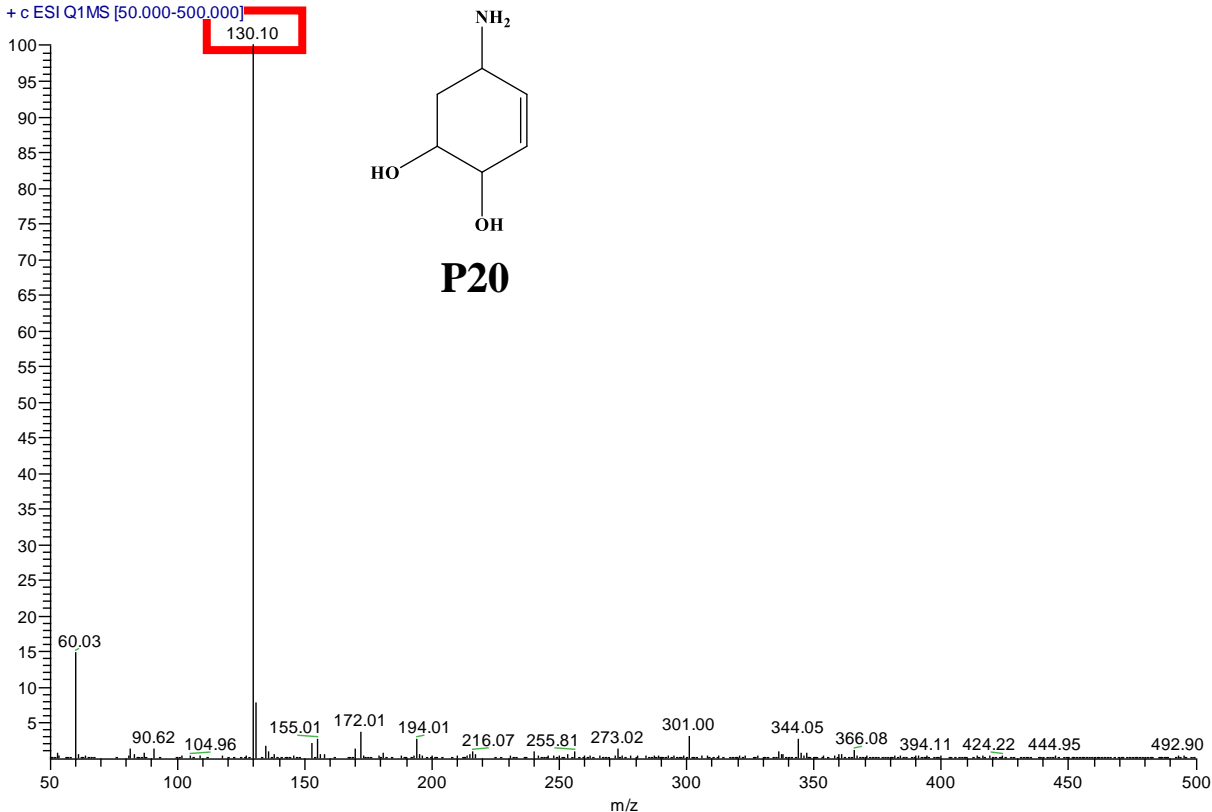

20240721-NB-8 #616-674 RT: 4.41-4.83 AV: 59 SB: 44 3.95-4.26 NI: 8.42F6  
T: + c ESI Q1MS [50.000-500.000]

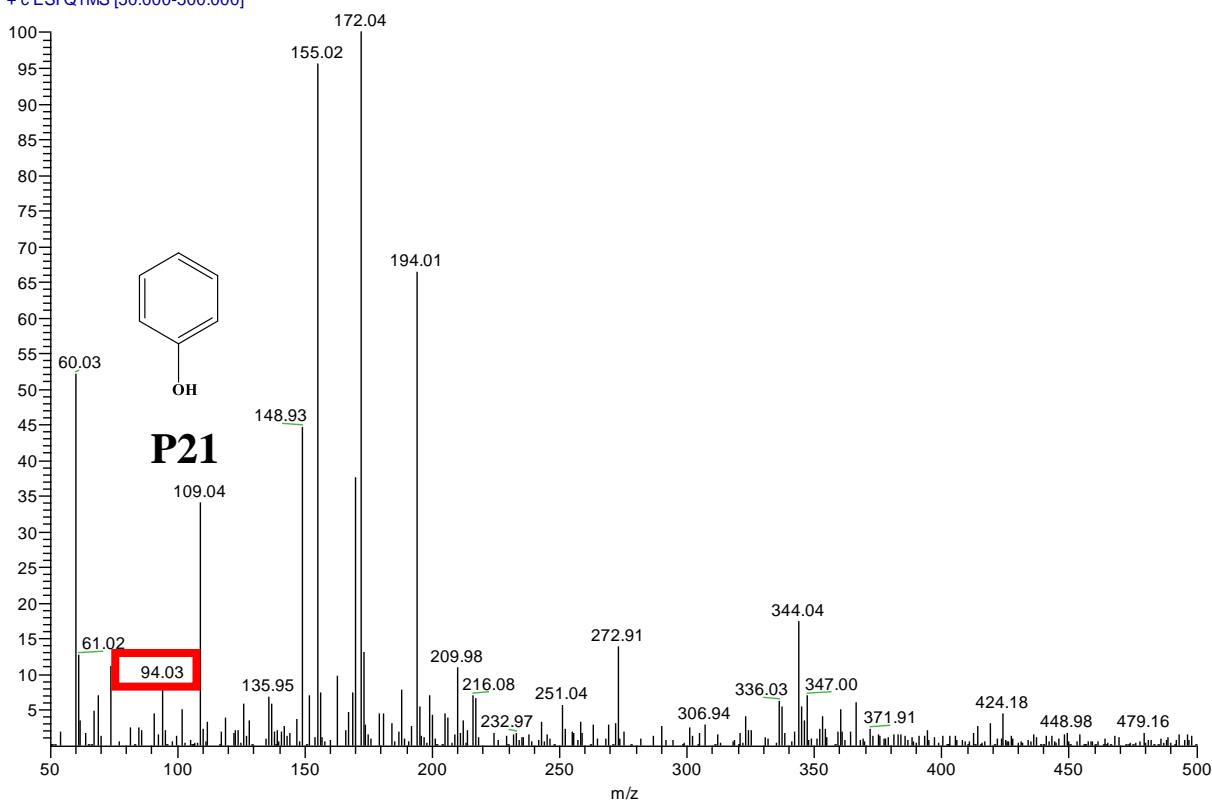

20240721-NB-8 #901-948 RT: 6.45-6.79 AV: 48 SB: 31 5.89-6.10 NI: 1 02F7  
T: + c ESI Q1MS [50.000-500.000]

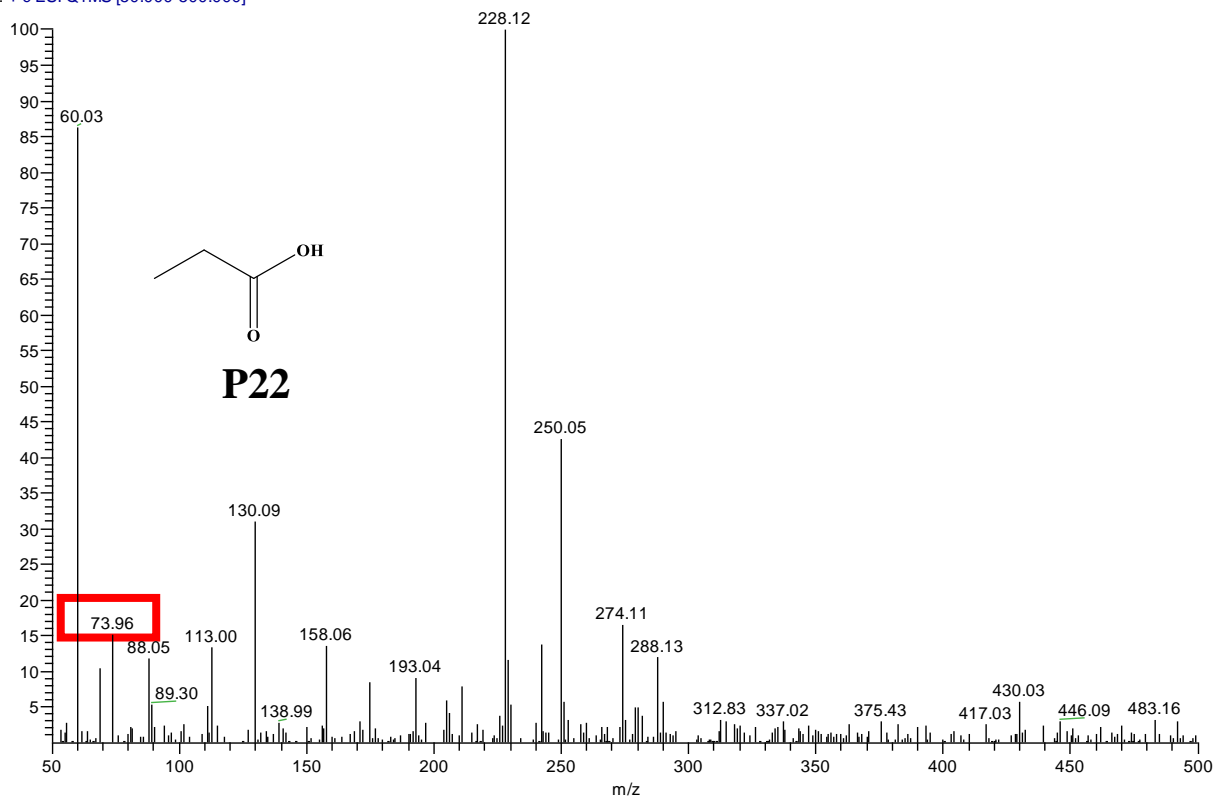

20240721-NB-8 #550-648 RT: 3.94-4.64 AV: 99 SB: 18 0.03-0.16 NI: 8 49F7  
T: + c ESI Q1MS [50.000-500.000]

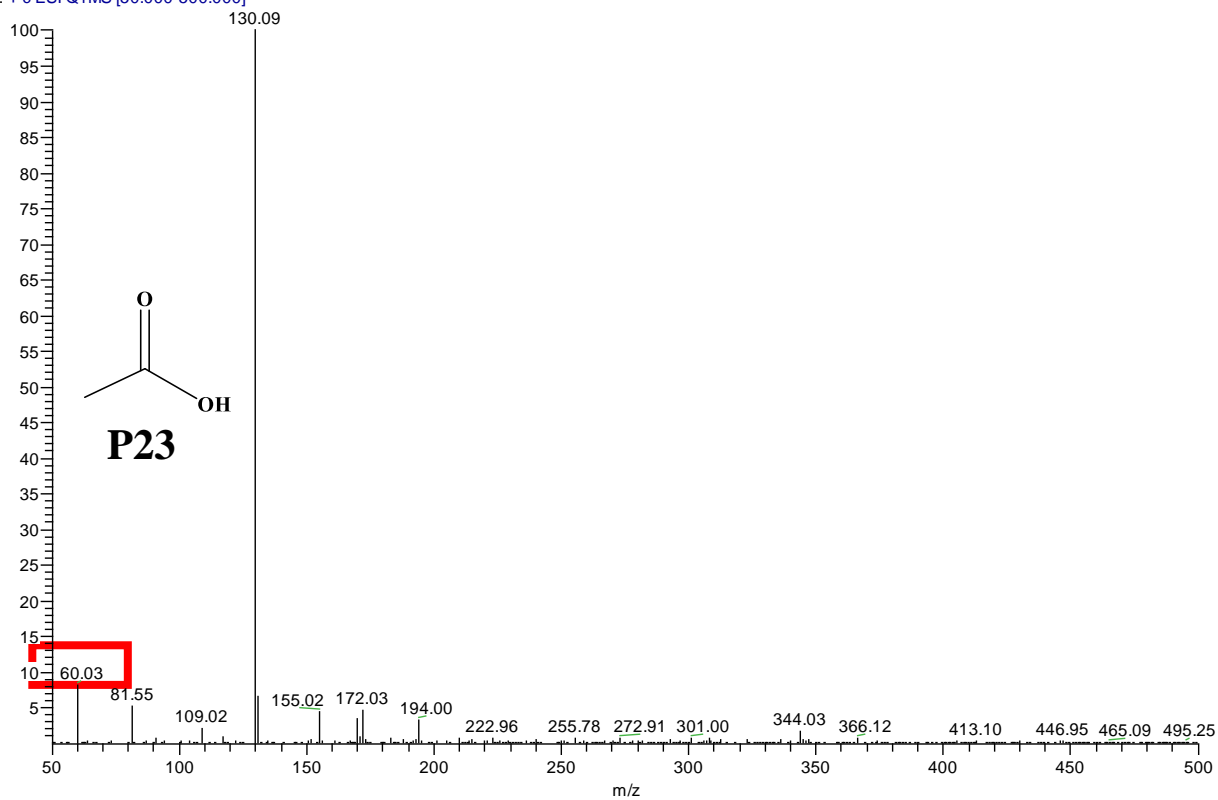

Supplement: d4en00475b1.pdf [file d4en00475b1.pdf]
